# Supplementary material for: Radiative Forcing by Light-Absorbing Particles in Snow in Northeastern China Retrieved from Satellite Observations
Source: Copernicus journal article supplement (doi:10.5194/acp-2018-1306), 2019-01-14
Supplement: Supplementary file 1 [file acp-2018-1306-supplement.pdf]

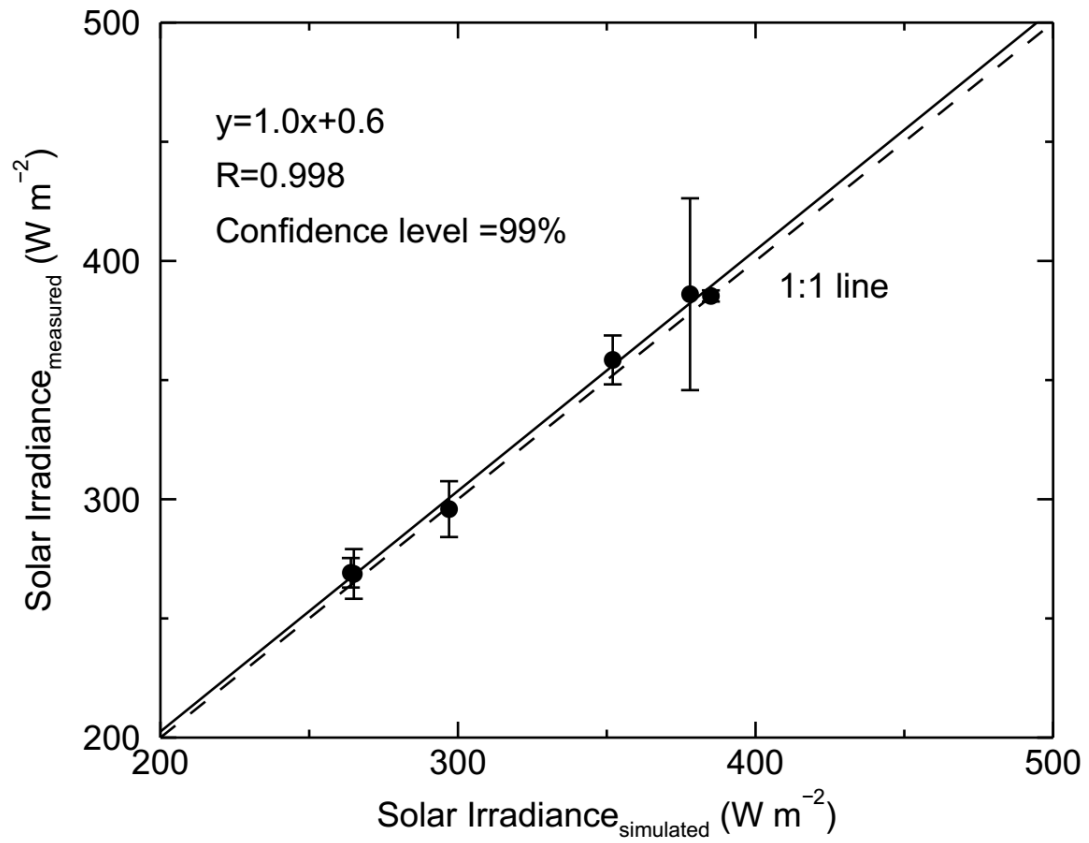

1  
 2 **Figure S1.** A comparison of the SBDART-simulated and ASD-measured solar  
 3 irradiance values in January 2014.

4  
 5

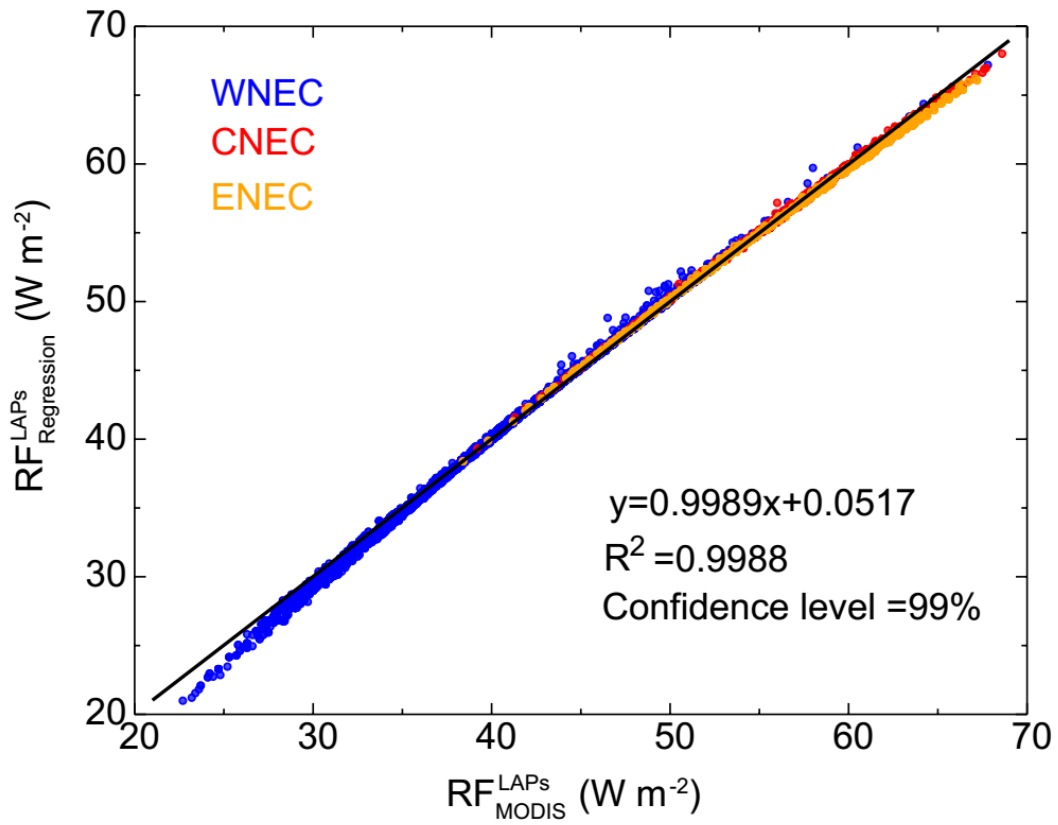

1

2 **Figure S2.** A comparison of  $RF_{MODIS}^{LAPs}$  and regressed radiative forcing ( $RF_{Regression}^{LAPs}$ ).

3 Different color represents different regions defined in Section 4.3.

4

5
